# Supplementary material for: Enhanced comprehensive performance of carbon-based hole-transport-layer-free CsPbI2Br solar cells by a low-cost and stable long chain polymer
Source: Royal Society of Chemistry journal article supplement (doi:10.1039/d3tc03196a), 2023-12-15
Supplement: d3tc03196a1.pdf [file d3tc03196a1.pdf]

## Supporting Information

### **Enhanced comprehensive performance of carbon-based hole-transport-layer-free CsPbI<sub>2</sub>Br solar cells by a low-cost and stable long chain polymer**

*Wenxuan Li, Yali Li\*, Zhe Gao, Guodong Wan, Xiaoyang Liu, Yujun Fu, Qiming Liu, Deyan He and Junshuai Li\**

LONGi Institute of Future Technology, and School of Materials & Energy, Lanzhou University, 222 South Tianshui Road, Lanzhou 730000, China

\*Corresponding authors. E-mail: [liyli@lzu.edu.cn](mailto:liyli@lzu.edu.cn) (Y. Li) and [jshli@lzu.edu.cn](mailto:jshli@lzu.edu.cn) (J. Li).

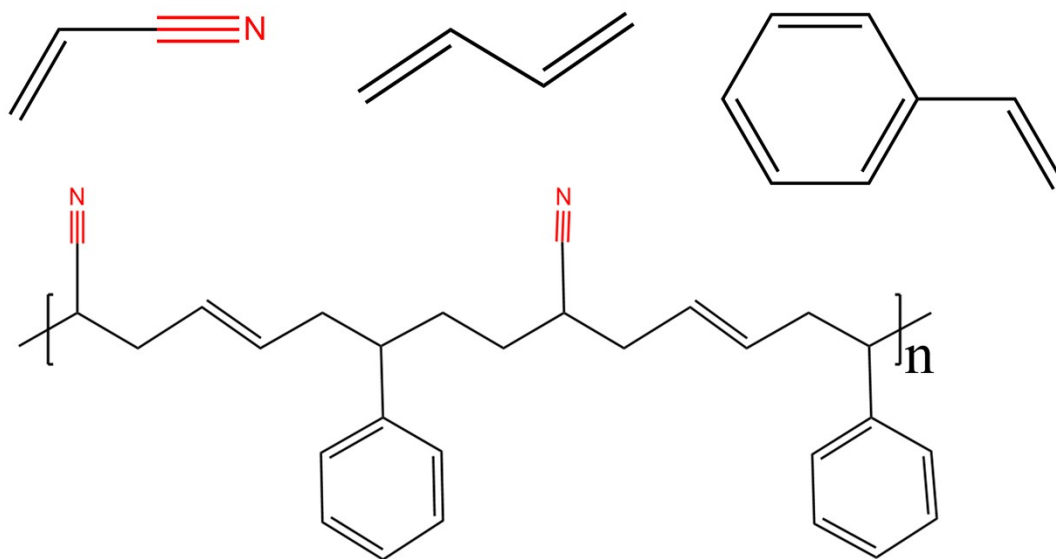

**Figure S1.** Molecular structures of the precursors (Top: acrylonitrile, butadiene and styrene from left to right) for synthesizing ABS (bottom).

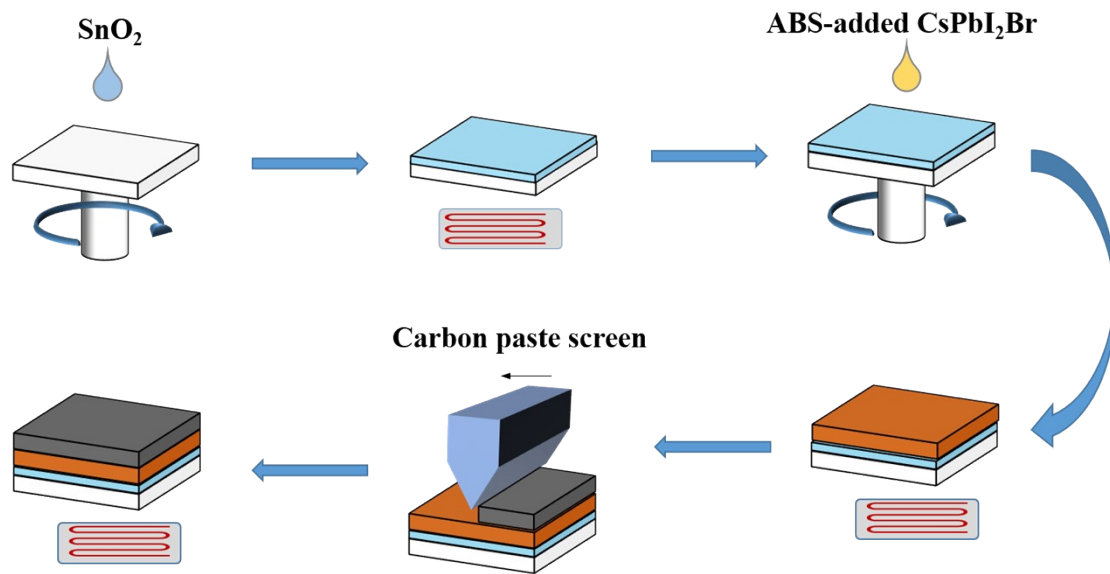

**Figure S2.** Main procedures of fabricating an HTL-free CsPbI<sub>2</sub>Br solar cell with a carbon electrode.

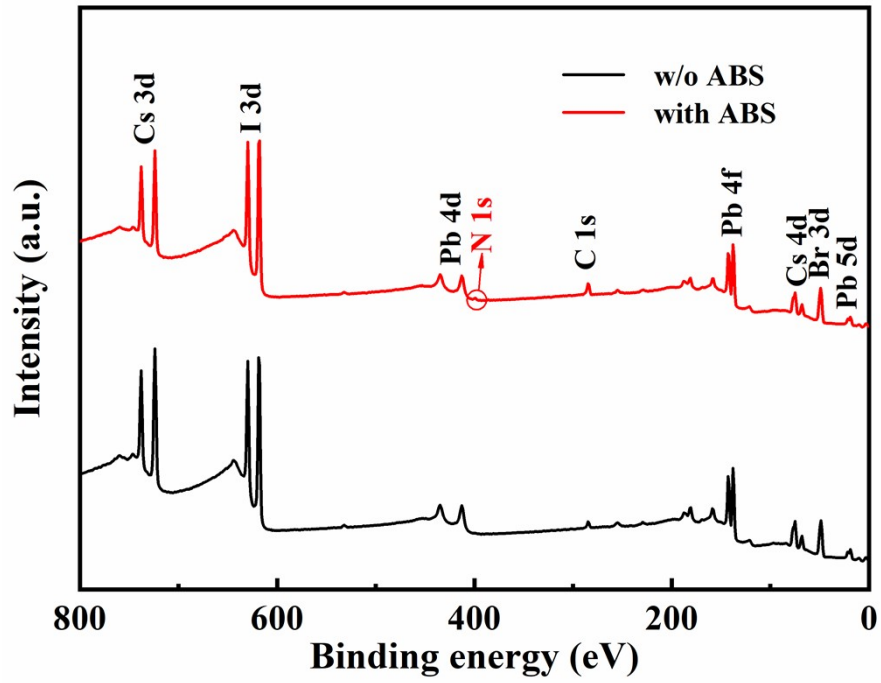

**Figure S3.** XPS full spectra of the pristine and ABS-added CsPbI<sub>2</sub>Br layers.

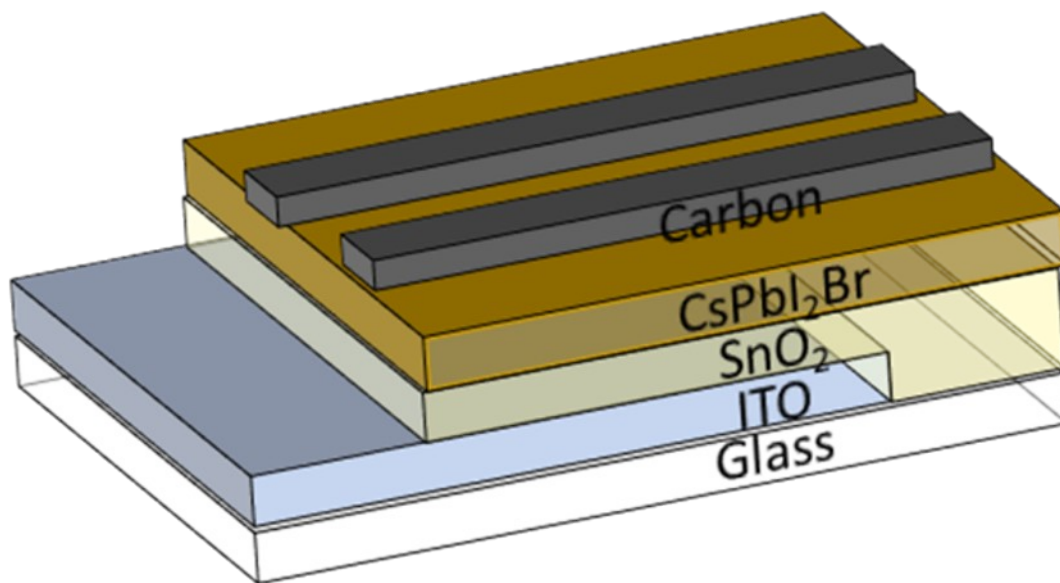

**Figure S4.** Device configuration of the HTM-free carbon-based CsPbI<sub>2</sub>Br solar cells.

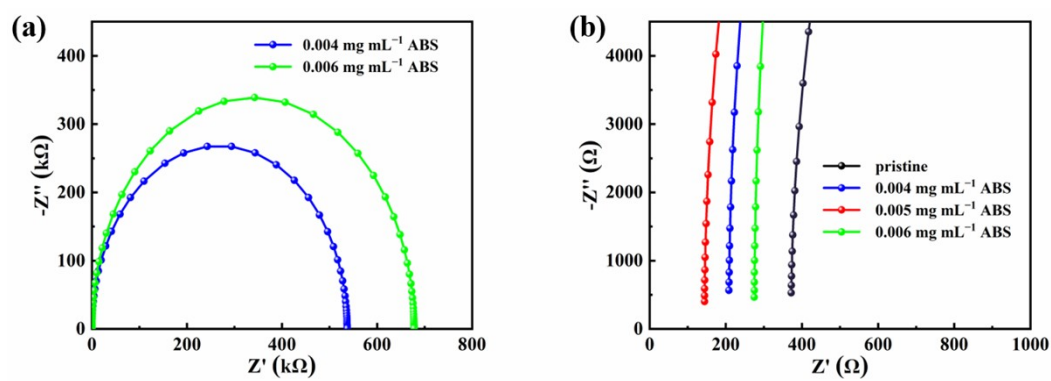

**Figure S5.** (a) Nyquist plots of the EIS curves for the devices prepared with the ABS addition of 0.004 and 0.006 mg mL<sup>-1</sup>. (b) Enlarged plots of the EIS curves at high frequency for the devices prepared with different ABS additions.

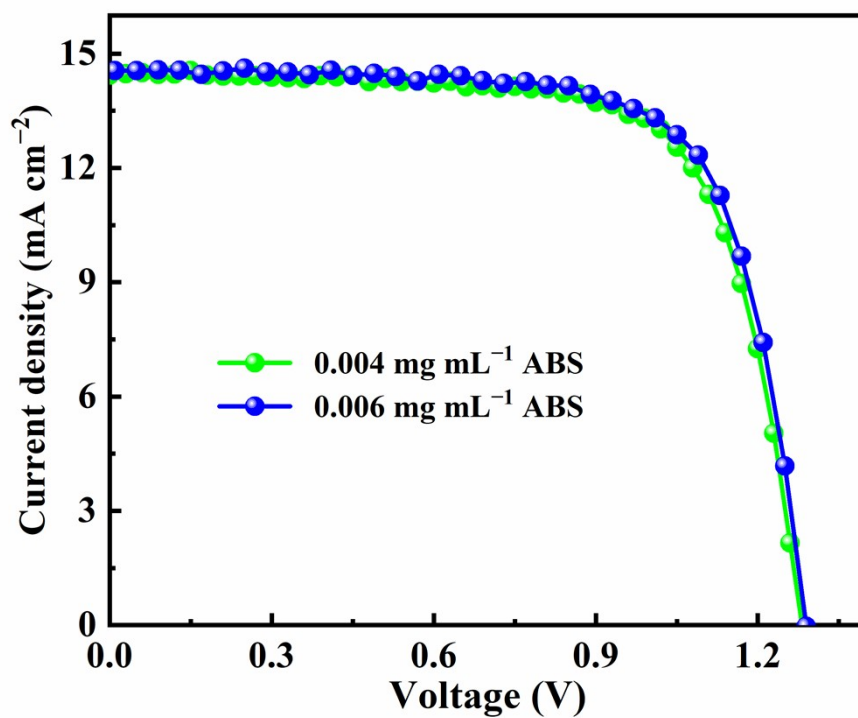

**Figure S6.** Illuminated  $J$ - $V$  curves at AM 1.5G for the devices prepared with the ABS addition of 0.004 and 0.006 mg mL<sup>-1</sup>

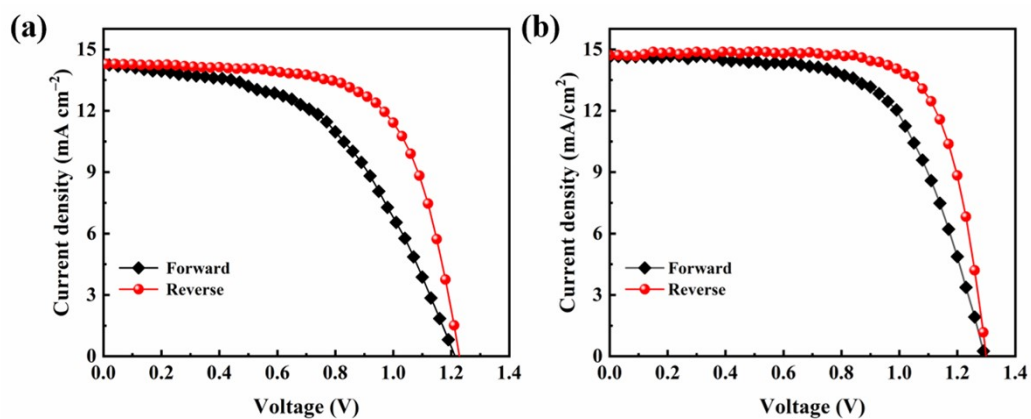

**Figure S7.**  $J$ - $V$  curves of the (a) pristine and (b) 0.005  $\text{mg mL}^{-1}$  ABS-added champion CsPbI<sub>2</sub>Br PSCs at the forward and reverse scans.



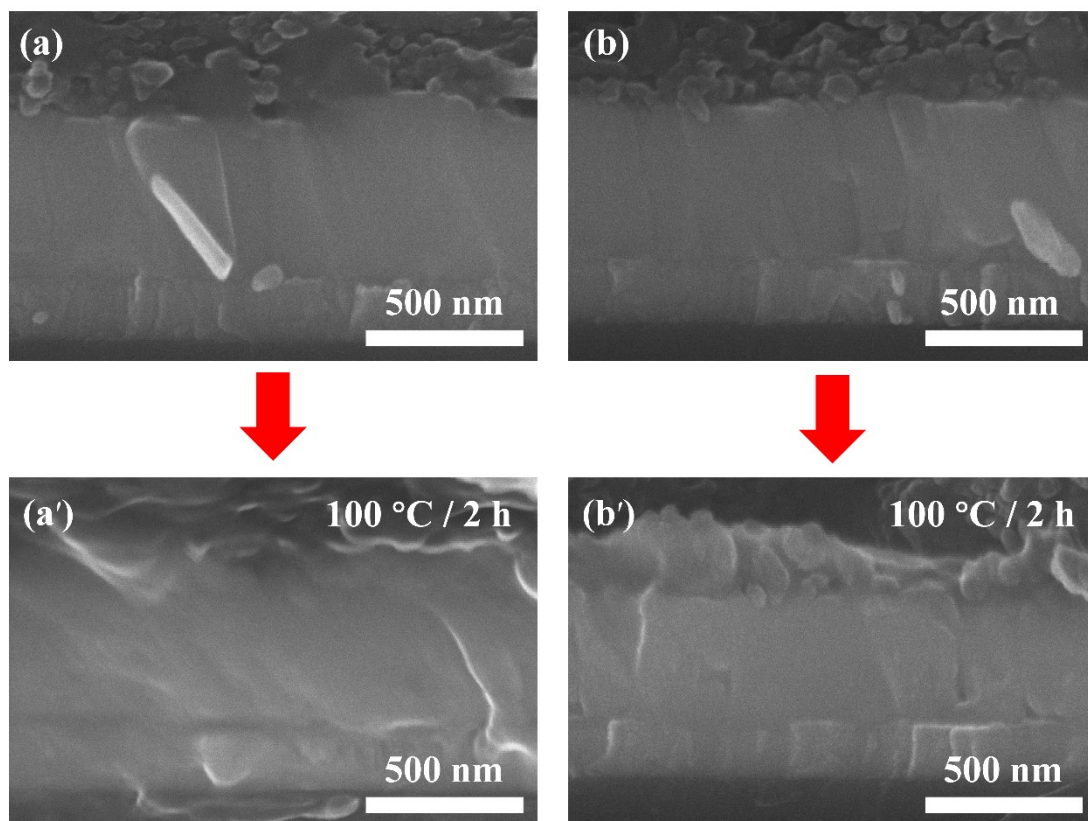

**Figure S8.** Cross-sectional SEM images of the (a, a') pristine device and (b, b') 0.005 mg mL<sup>-1</sup> ABS-added device before and after annealing at 100 °C for 2 h in air.

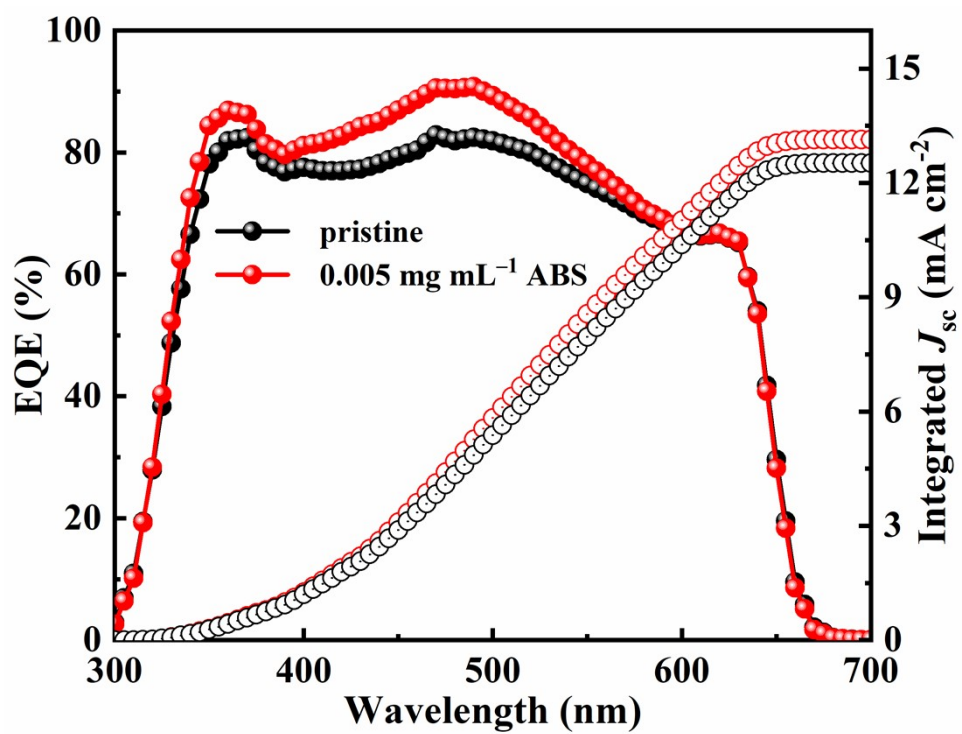

**Figure S9.** EQE spectra and the integrated  $J_{sc}$  of the devices prepared with the ABS addition of 0 and 0.005 mg mL<sup>-1</sup>.

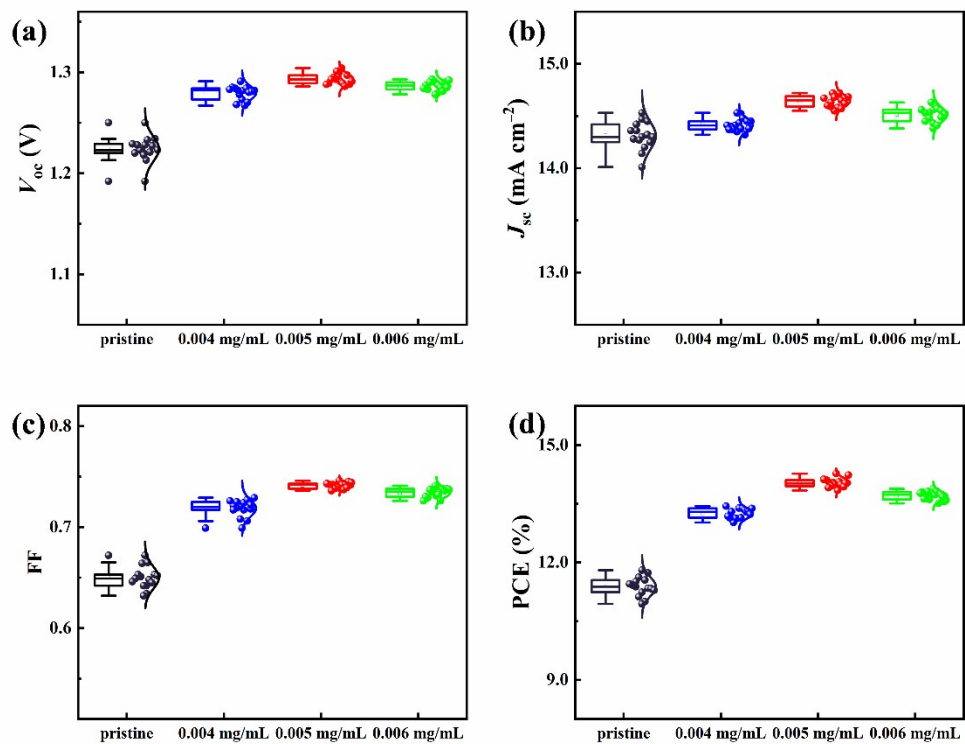

**Figure S10.** Statistical charts of (a)  $V_{oc}$ , (b)  $J_{sc}$ , (c) FF and (d) PCE of the 15 independent devices for each ABS addition.

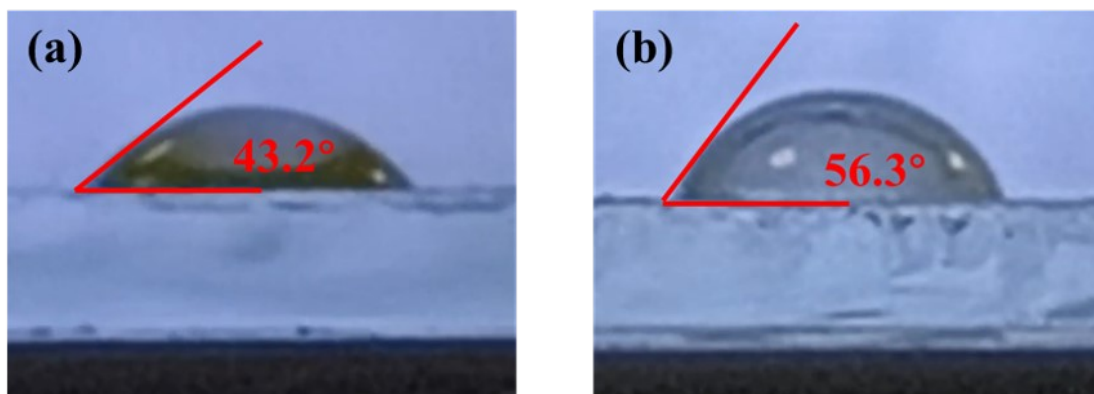

**Figure S11.** Water contact angle of the (a) pristine and (b)  $0.005 \text{ mg mL}^{-1}$  ABS-added CsPbI<sub>2</sub>Br layers.

**Table S1.** Molecular mass and density of ABS.

| <b>Sample</b> | <b>Mw (g/mol)</b> | <b><math>\rho</math> (g/ml)</b> |
|---------------|-------------------|---------------------------------|
| ABS           | 633.91            | 1.05                            |

**Table S2.** XRD data of the CsPbI<sub>2</sub>Br layers with different ABS additions.

| Sample                        | (100)           |      | (200)           |      |
|-------------------------------|-----------------|------|-----------------|------|
|                               | $2\theta^\circ$ | FWHM | $2\theta^\circ$ | FWHM |
| pristine                      | 14.63°          | 1.11 | 29.55°          | 0.58 |
| 0.004 mg ml <sup>-1</sup> ABS | 14.62°          | 0.99 | 29.53°          | 0.47 |
| 0.005 mg ml <sup>-1</sup> ABS | 14.62°          | 0.90 | 29.54°          | 0.46 |
| 0.006 mg ml <sup>-1</sup> ABS | 14.63°          | 0.89 | 29.56°          | 0.48 |

**Table S3.** Carrier lifetimes estimated from the TRPL spectra of Figure 4d.

| <b>Sample</b>                 | <b><math>\tau_1</math> (ns)</b> | <b><math>\tau_2</math> (ns)</b> | <b><math>A_1</math></b> | <b><math>A_2</math></b> | <b><math>\tau_{ave}</math> (ns)</b> |
|-------------------------------|---------------------------------|---------------------------------|-------------------------|-------------------------|-------------------------------------|
| Pristine                      | 1.11                            | 8.86                            | 227.25                  | 2.18                    | 1.66                                |
| 0.005 mg mL <sup>-1</sup> ABS | 0.92                            | 12.47                           | 292.37                  | 2.41                    | 2.08                                |

**Table S4.** Summary of the reported photovoltaic parameters of the HTM-free carbon-based CsPbI<sub>2</sub>Br PSCs.

| Strategy                                                                  | $J_{sc}$<br>(mA cm <sup>-2</sup> ) | $V_{oc}$<br>(V) | FF<br>(%) | PCE<br>(%) | Ref       |
|---------------------------------------------------------------------------|------------------------------------|-----------------|-----------|------------|-----------|
| ABS additive                                                              | 14.69                              | 1.30            | 74.7      | 14.27      | This work |
| Cs <sub>2</sub> PtI <sub>6</sub> surface modification                     | 14.85                              | 1.28            | 72.0      | 13.69      | [44]      |
| PTU and PU interface modification                                         | 14.83                              | 1.22            | 72.0      | 13.01      | [45]      |
| ATHPBr additive                                                           | 14.28                              | 1.30            | 78.1      | 14.50      | [46]      |
| non-hydrophilic Cl-containing SnO <sub>2</sub> ETL                        | 14.70                              | 1.26            | 76.2      | 14.11      | [47]      |
| CsPbI <sub>2</sub> Br/CsPb <sub>2</sub> I <sub>4</sub> Br heterostructure | 14.60                              | 1.32            | 79.1      | 15.25      | [48]      |
| HTAB surface modification                                                 | 14.10                              | 1.26            | 80.6      | 14.31      | [49]      |
| KTFA and CF <sub>3</sub> PMABr additive                                   | 14.98                              | 1.27            | 73.7      | 14.05      | [23]      |
| P-F-PEAI/Br passivation layer                                             | 14.91                              | 1.27            | 73.8      | 13.97      | [50]      |
| Ionic modified ZnO layer                                                  | 14.95                              | 1.27            | 75.1      | 14.25      | [51]      |
| EDTA interface modification                                               | 14.95                              | 1.26            | 74.3      | 13.94      | [52]      |



**Table S5.** Photovoltaic parameters of the champion devices fabricated with the pristine and 0.005 mg mL<sup>-1</sup> ABS-added CsPbI<sub>2</sub>Br layers at the forward and reverse scans.

| Devices                       |         | $V_{oc}$ (V) | $J_{sc}$ (mA cm <sup>-2</sup> ) | FF    | PCE (%) | HI (%) |
|-------------------------------|---------|--------------|---------------------------------|-------|---------|--------|
| pristine                      | Forward | 14.28        | 1.213                           | 0.522 | 9.04    | 23.4%  |
|                               | Reverse | 14.30        | 1.228                           | 0.672 | 11.80   |        |
| 0.005 mg mL <sup>-1</sup> ABS | Forward | 14.62        | 1.294                           | 0.632 | 11.96   | 16.2%  |
|                               | Reverse | 14.69        | 1.300                           | 0.747 | 14.27   |        |
